# Supplementary material
Source: MDPI journal article supplement (https://www.mdpi.com/2227-7102/8/3/145)
Supplement: s1 [file s1 › Supplemental_Material_A.pdf]

## **Supplemental Material A**

### **Item statistics**

*Citation:* Großschedl, J., Mahler, D., & Harms, U. (2018). Construction and evaluation of an instrument to measure content knowledge in biology: The CK-IBI [Supplemental material]. *Education Sciences*.

*Supplemental Material A.* Item statistics for Evaluation 1 and 2

| STUDY 1 |            |                | STUDY 2          |          |                |        |       |                 |                                   |
|---------|------------|----------------|------------------|----------|----------------|--------|-------|-----------------|-----------------------------------|
| Item    | Difficulty | Discrimination | Difficulty logit | SE logit | Discrimination | OUTFIT | INFIT | DIF for 'track' | DIF for 'second teaching subject' |
| EC1     | 0.55       | 0.34           | -0.42            | 0.07     | 0.30           | 1.02   | 1.01  | A               | C                                 |
| EC2     | 0.28       | 0.44           | 0.29             | 0.06     | 0.51           | 0.97   | 0.97  | A               | A                                 |
| EC3     | 0.71       | 0.22           | -0.83            | 0.08     | 0.27           | 1.07   | 1.07  | A               | A                                 |
| EC4     | 0.35       | 0.15           | 0.42             | 0.09     | 0.33           | 1.00   | 1.00  | A               | A                                 |
| EC5     | 0.48       | 0.21           | -0.09            | 0.07     | 0.37           | 0.98   | 0.98  | A               | A                                 |
| EC6     | 0.80       | 0.33           | -1.32            | 0.09     | 0.29           | 0.90   | 0.96  | A               | A                                 |
| EC7     | 0.10       | 0.27           | --               | --       | --             | --     | --    | --              | --                                |
| EC8     | 0.19       | 0.24           | --               | --       | --             | --     | --    | --              | --                                |
| EV1     | 0.22       | 0.86           | -1.29            | 0.09     | 0.34           | 0.86   | 0.93  | A               | A                                 |
| EV2     | 0.19       | 0.38           | -0.89            | 0.08     | 0.38           | 0.95   | 0.96  | A               | A                                 |
| EV3     | 0.37       | 0.24           | 1.46             | 0.08     | 0.34           | 1.04   | 1.06  | A               | A                                 |
| EV4     | 0.31       | 0.58           | -0.56            | 0.06     | 0.49           | 0.89   | 0.92  | A               | A                                 |
| EV5     | 0.19       | 0.66           | -0.29            | 0.07     | 0.45           | 1.06   | 1.04  | A               | B                                 |
| EV6     | 0.19       | 0.65           | -0.38            | 0.05     | 0.43           | 1.07   | 1.05  | C               | A                                 |
| EV7     | --         | --             | -0.14            | 0.07     | 0.25           | 1.08   | 1.08  | A               | A                                 |
| EV8     | --         | --             | -0.39            | 0.09     | 0.40           | 0.92   | 0.93  | A               | A                                 |
| GM1     | 0.31       | 0.32           | 0.91             | 0.08     | 0.37           | 1.04   | 1.04  | A               | A                                 |
| GM2     | 0.44       | 0.51           | -0.25            | 0.07     | 0.45           | 0.96   | 0.97  | A               | A                                 |
| GM3     | 0.45       | 0.65           | -1.01            | 0.09     | 0.30           | 1.01   | 1.01  | A               | A                                 |
| GM4     | 0.42       | 0.61           | -0.78            | 0.09     | 0.37           | 0.95   | 0.96  | A               | A                                 |
| GM5     | 0.37       | 0.41           | 0.22             | 0.09     | 0.29           | 1.01   | 1.01  | A               | A                                 |
| GM6     | 0.46       | 0.22           | 1.12             | 0.08     | 0.20           | 1.11   | 1.06  | A               | A                                 |
| GM7     | --         | --             | 0.56             | 0.07     | 0.49           | 0.89   | 0.90  | A               | A                                 |
| GM8     | 0.31       | 0.72           | --               | --       | --             | --     | --    | --              | --                                |
| M1      | 0.25       | 0.34           | -0.65            | 0.09     | 0.29           | 0.98   | 1.00  | A               | A                                 |
| M2      | 0.17       | 0.23           | 1.28             | 0.09     | 0.31           | 0.97   | 0.97  | A               | A                                 |
| M3      | 0.21       | 0.31           | 0.38             | 0.09     | 0.21           | 1.08   | 1.07  | A               | A                                 |
| M4      | 0.29       | 0.28           | 0.66             | 0.07     | 0.44           | 0.92   | 0.94  | A               | B+                                |
| M5      | 0.17       | 0.26           | 0.40             | 0.07     | 0.33           | 1.01   | 1.01  | A               | A                                 |
| M6      | --         | --             | -0.09            | 0.07     | 0.49           | 0.98   | 0.99  | A               | B                                 |
| M7      | --         | --             | 0.18             | 0.09     | 0.46           | 0.88   | 0.90  | A               | A                                 |
| M8      | --         | --             | -0.23            | 0.06     | 0.40           | 1.04   | 1.06  | C               | A                                 |
| P1      | 0.21       | 0.37           | 0.03             | 0.09     | 0.26           | 1.04   | 1.02  | A               | A                                 |

| STUDY 1 |            |                | STUDY 2          |          |                |        |       |                 |                                   |
|---------|------------|----------------|------------------|----------|----------------|--------|-------|-----------------|-----------------------------------|
| Item    | Difficulty | Discrimination | Difficulty logit | SE logit | Discrimination | OUTFIT | INFIT | DIF for 'track' | DIF for 'second teaching subject' |
| P2      | 0.23       | 0.55           | 0.13             | 0.09     | 0.43           | 0.92   | 0.93  | A               | C+                                |
| P3      | 0.36       | 0.59           | -0.65            | 0.07     | 0.37           | 1.00   | 1.00  | A               | A                                 |
| P4      | 0.35       | 0.33           | 0.25             | 0.07     | 0.34           | 0.99   | 0.99  | A               | A                                 |
| P5      | 0.41       | 0.20           | 1.09             | 0.06     | 0.47           | 0.95   | 1.03  | A               | A                                 |
| P6      | 0.32       | 0.57           | -0.01            | 0.09     | 0.29           | 1.02   | 1.01  | A               | A                                 |
| P7      | 0.29       | 0.21           | 0.93             | 0.46     | 0.39           | 1.02   | 1.03  | A               | A                                 |
| P8      | --         | --             | -0.04            | 0.07     | 0.41           | 1.02   | 1.01  | A               | A                                 |

*Note.* EC = ecology; EV = evolution; GM = genetics and microbiology; M = morphology; P = physiology; A = negligible DIF; B = slight to moderate DIF; C = moderate to large DIF. '+' = Easier for reference group (reference group for 'track' = academic; reference group for 'second teaching subject' = second science subject)
